# Supplementary material for: β-Caryophyllene Inhibits Oxaliplatin-Induced Peripheral Neuropathy in Mice: Role of Cannabinoid Type 2 Receptors, Oxidative Stress and Neuroinflammation
Source: MDPI journal article supplement (doi:10.3390/antiox12101893), 2023-10-22
Supplement: s1 [file s1]

**Agnes et al. (2023)**  
**Supplementary Figure S1:**

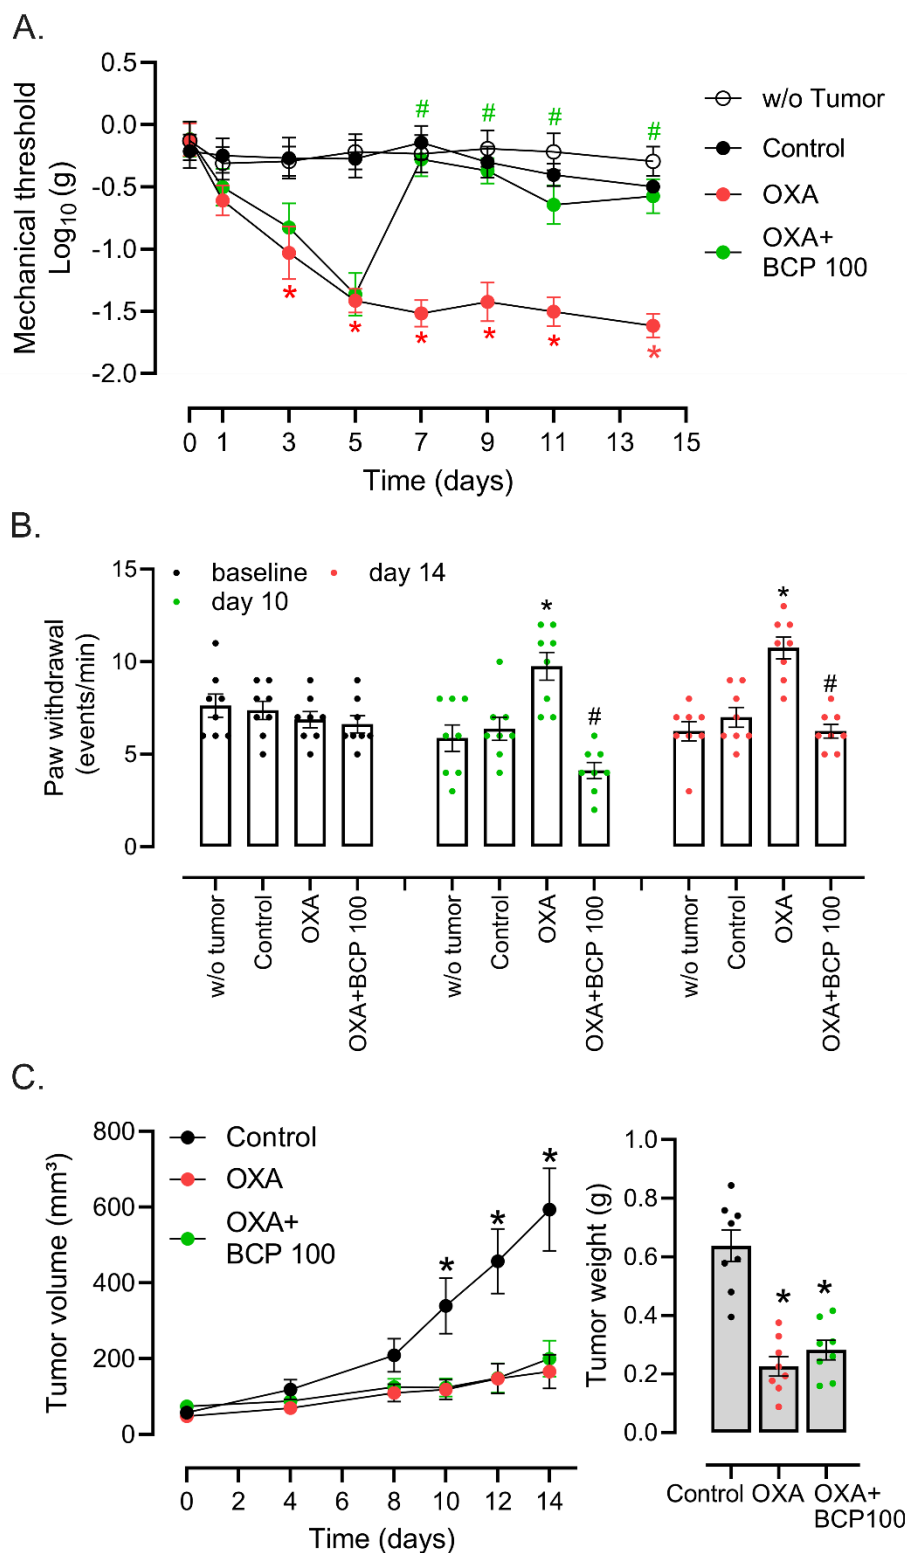

**Figure S1: Supplementary to figure 4.** (A) Von Frey, (B) cold plate, (C) tumor volume and weight in the therapeutic protocol. In this experiment, tumor-free animals (“w/o tumors” group) were also examined, showing that the presence of tumors did not affect basal nociceptive thresholds in the model ( $n=8/\text{group}$ ). \* Different from vehicle/control and “w/o tumor” groups in A and B, \*different from all other groups in C, and #different from the OXA group, considering the same experimental time point (ANOVA;  $p < 0.05$ ).
